# Supplementary material for: Intestine-specific homeobox (ISX) upregulates E2F1 expression and related oncogenic activities in HCC
Source: PubMed Central journal article supplement (PMC5095049; doi:10.18632/oncotarget.9228), 2016-05-09
Supplement: oncotarget-07-36924-s001.pdf [file oncotarget-07-36924-s001.pdf]

# Intestine-specific homeobox (ISX) upregulates E2F1 expression and related oncogenic activities in HCC

## SUPPLEMENTARY FIGURE

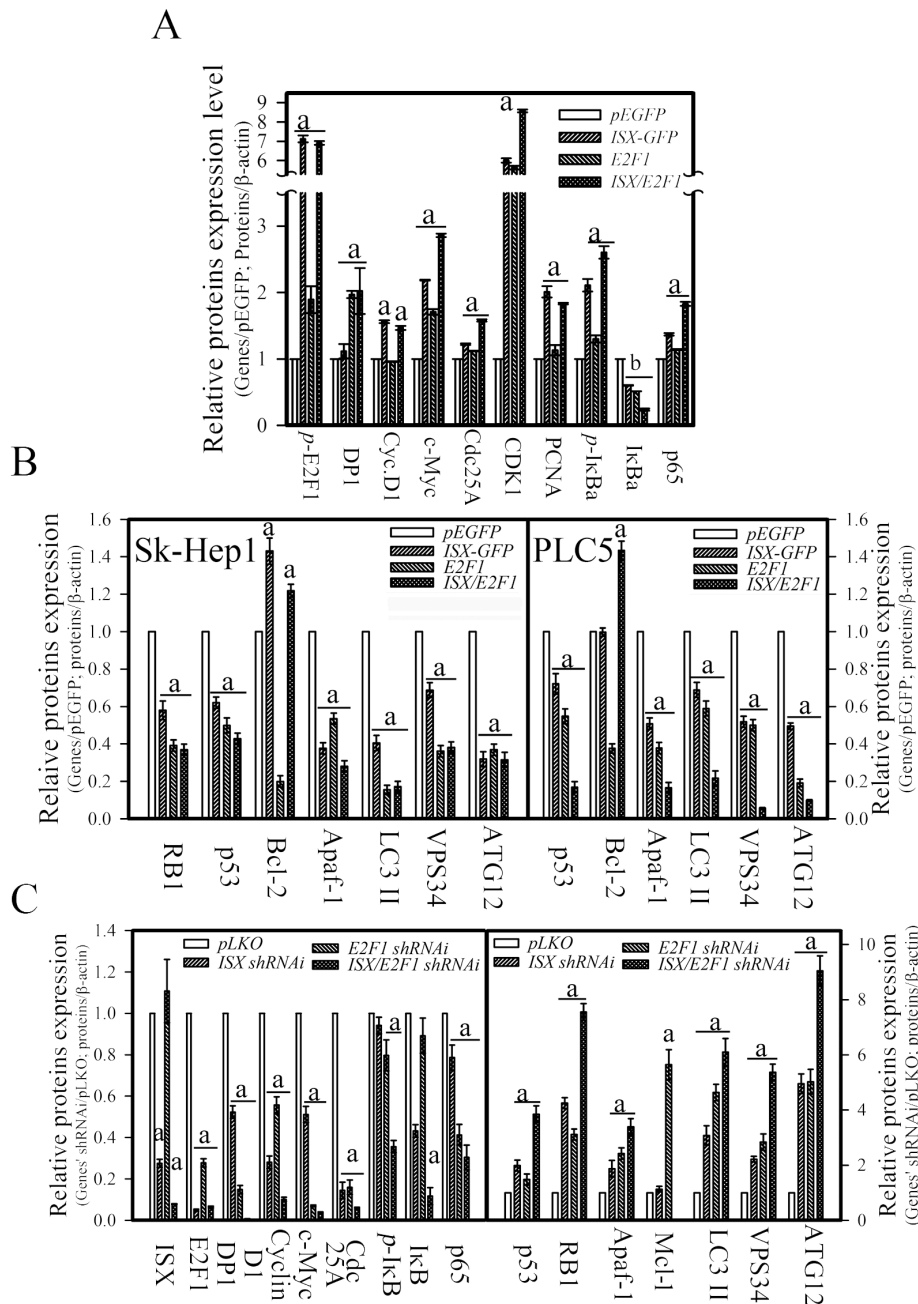

**Supplementary Figure S1: Relative expression levels of proteins in cells induced by forced expression vectors ISX and/or E2F1 and knockdown vectors ISX and/or E2F1.** A. Relative expression levels of protein in SK-Hep1 cells were calculated from the intensities of the respective bands shown in Figure 3D. B. Relative expression levels of protein in SK-Hep1 and PLC5 cells were calculated from the intensities of the respective bands shown in Figure 3E. C. Relative expression levels of protein in SK-Hep1 and Huh 7 cells were calculated from the intensities of respective bands shown in Figure 3F. All results are shown as means  $\pm$  S.D. ( $N = 3$ ), a,  $p < 0.001$ .
